# Supplementary material for: Autophagy variation within a cell population determines cell fate through selective degradation of Fap-1
Source: Springer Nature journal article supplement (doi:10.1038/ncb2886), 2013-12-08
Supplement: 41556_2014_BFncb2886_MOESM38_ESM.pdf [file 41556_2014_BFncb2886_MOESM38_ESM.pdf]

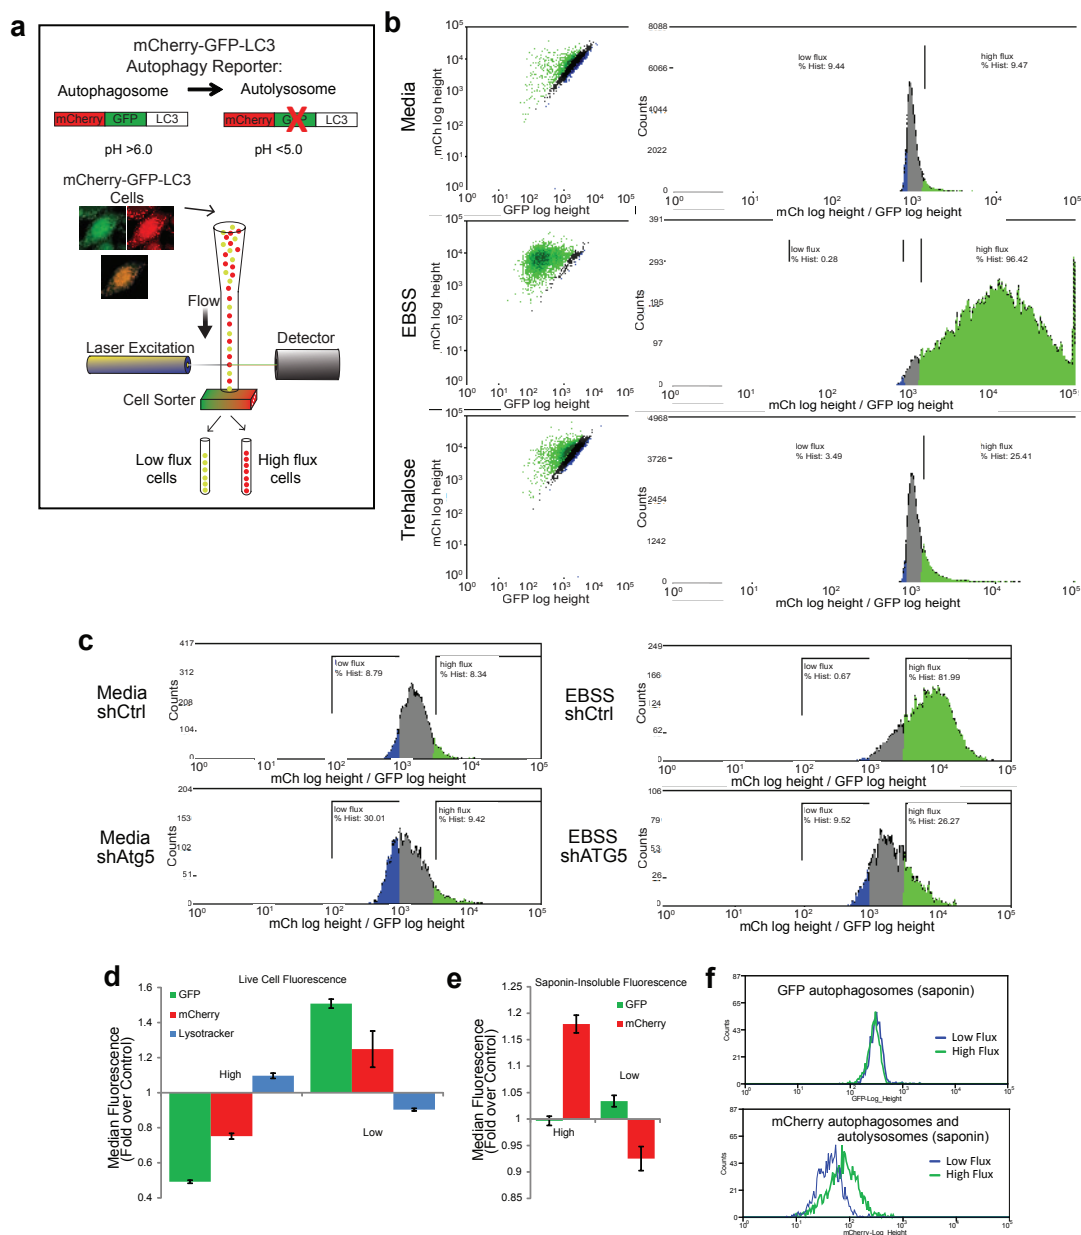

**Supplementary Figure 1** Method to sort cells with high and low autophagic flux by flow cytometry accurately measures basal and induced autophagic flux. **a**, Cells constitutively expressing mCherry-GFP-LC3 are sorted based on the relative ratio of mCherry/EGFP fluorescence which changes in response to the pH gradient as autophagosomes fuse with lysosomes to form autolysosomes (autophagic flux). **b**, BJAB mCherry-GFP-LC3 cells were treated with EBSS (100%) or trehalose (75 mM) for 4 hours followed by flow cytometry for autophagic flux. Data are representative of at least 3 independent experiments. **c**, HeLa mCherry-GFP-LC3 cells expressing control or Atg5 shRNA were treated with EBSS for 4 hours followed by flow cytometry for autophagic flux. Data

are representative of at least 3 independent experiments. **d**, BJAB mCherry-GFP-LC3 cells were sorted by flow cytometry for high or low autophagic flux, then treated with LysoTracker Blue for 30 min. at 37 °C, followed by flow cytometry (median GFP, mCherry or LysoTracker Blue fluorescence normalized to fold over unsorted control, mean ± s.e.m., n=3 wells). **e**, BJAB mCherry-GFP-LC3 cells were sorted as in (d) followed by cytoplasmic extraction with 0.1 % saponin to eliminate non-lipidated LC3<sup>1</sup> and flow cytometry to quantitate autophagosome/autolysosome number (normalized fold over unsorted control median GFP or mCherry fluorescence, mean ± s.e.m., n=3 wells). **f**, Flow cytometry histograms of representative data from (e).

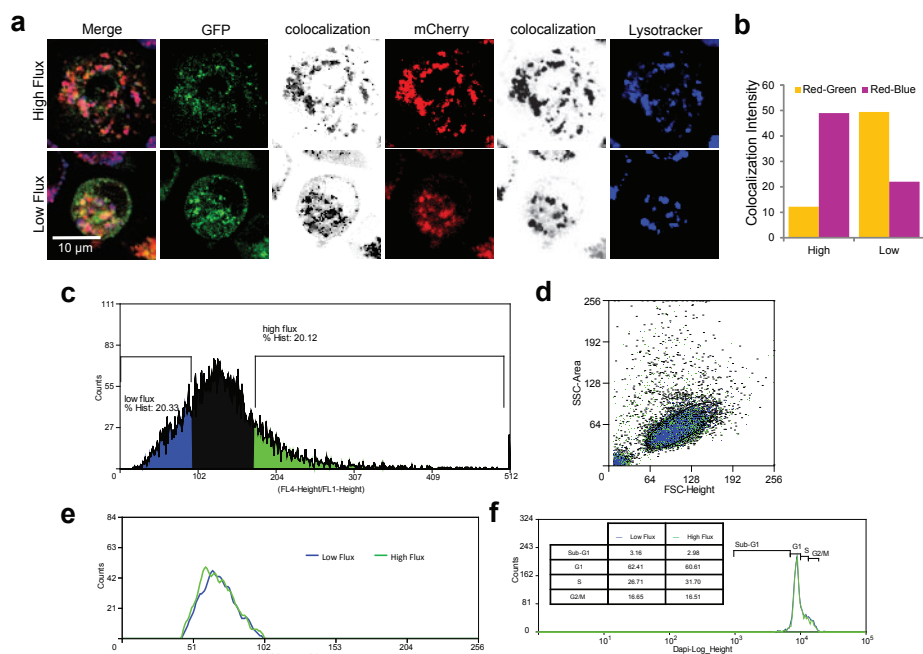

**Supplementary Figure 2** Confocal microscopy reveals differences in the number of autophagosomes and autolysosomes in flux sorted cells; High and low flux sorted cells exhibit similar size, cell cycle and apoptotic profile. **a**, HeLa mCherry-GFP-LC3 cells were sorted for autophagic flux, treated with Lysotracker Blue for 30 min. at 37 °C, adhered to slides by cytospin centrifugation, fixed with formaldehyde and visualized by spinning disc confocal microscopy; these

are the same fields depicted in Fig. 1d. Colocalization images were produced using ImageJ (see methods). **b**, Quantification of the colocalization images in **(a)**. Data are representative of 20 separate fields and have been repeated 5 times. **c**, BJAB mCherry-GFP-LC3 cells were sorted for autophagic flux by flow cytometry. **d, e**, Forward and side scatter of sorted cells in **(c)**. **f**, Cell cycle profiles of sorted cells in **(c)** stained with Hoechst 33342.

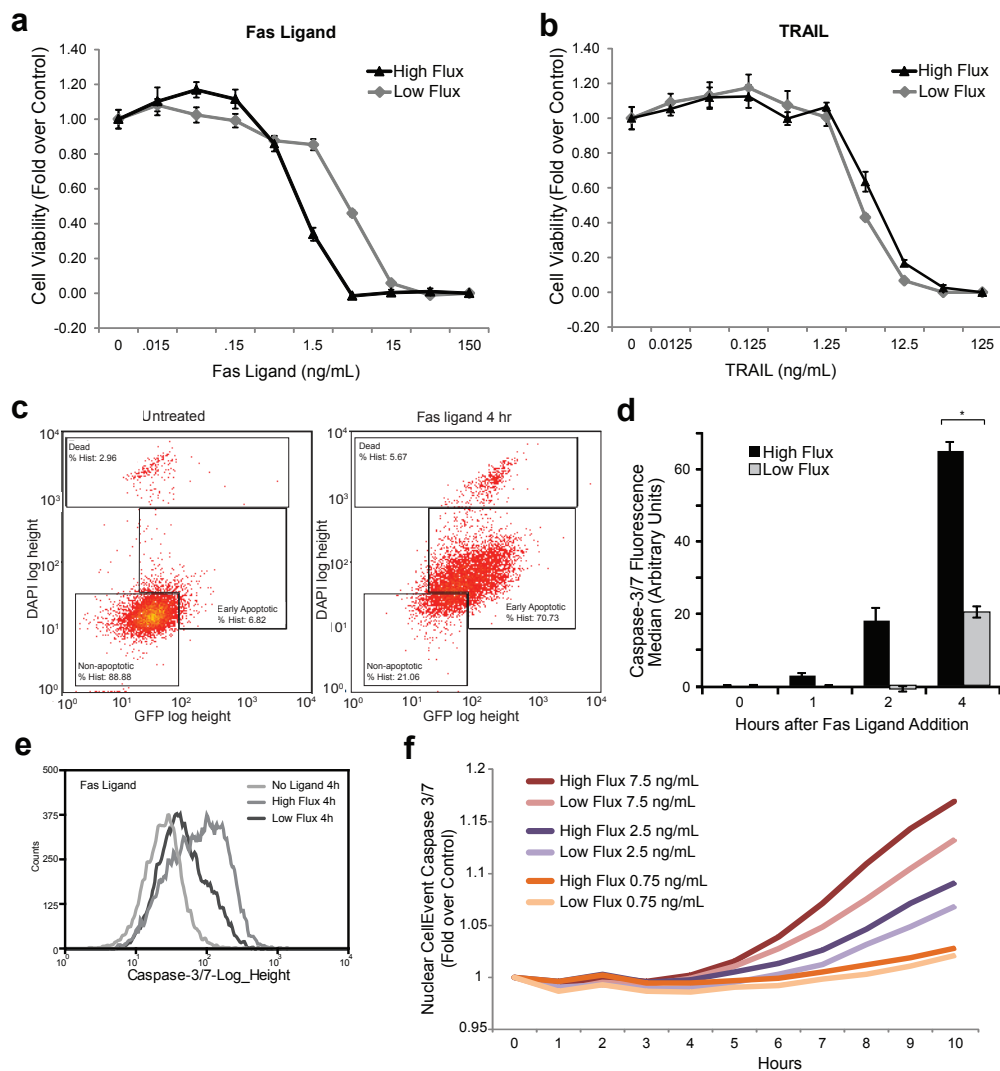

**Supplementary Figure 3** Autophagy modulation of Fas ligand-induced apoptosis and cell killing. **a, b**, BJAB mCherry-GFP-LC3 cells were sorted for autophagic flux by flow cytometry followed by treatment with Fas ligand (**a**) or TRAIL (**b**) for 24 hours and MTS assay for viability (fold over no ligand control, mean  $\pm$  s.e.m.,  $n=3$  wells). These are the full data sets from the same experiment depicted in Figure 2d. **c-e**, BJAB mCherry-GFP-LC3 cells were sorted as in (**a**) followed by treatment with Fas ligand for the indicated times in the presence of fluorogenic Caspase-3/7 substrate CellEvent Green (5  $\mu$ M) and analyzed by flow cytometry. **c**, Dot plot of Caspase-3/7 activity

vs. DAPI fluorescence in unsorted cells. **d**, Quantitation of Caspase-3/7 activity in sorted cells at the indicated time points (median CellEvent Green fluorescence, mean  $\pm$  s.e.m.,  $n=3$  wells,  $*p=0.0091$ ). **e**, Representative flow cytometry histograms of Caspase-3/7 activity in (**c, d**). **f**, BJAB mCherry-GFP-LC3 cells were sorted for autophagic flux as above, followed by treatment with Fas ligand at the indicated concentrations in the presence of fluorogenic CellEvent Caspase-3/7 substrate (5  $\mu$ M) and analyzed on an IncuCyte ZOOM for the indicated times (mean CellEvent Green fluorescence per field, mean,  $n=12$ : 4 fields for each of 3 wells).

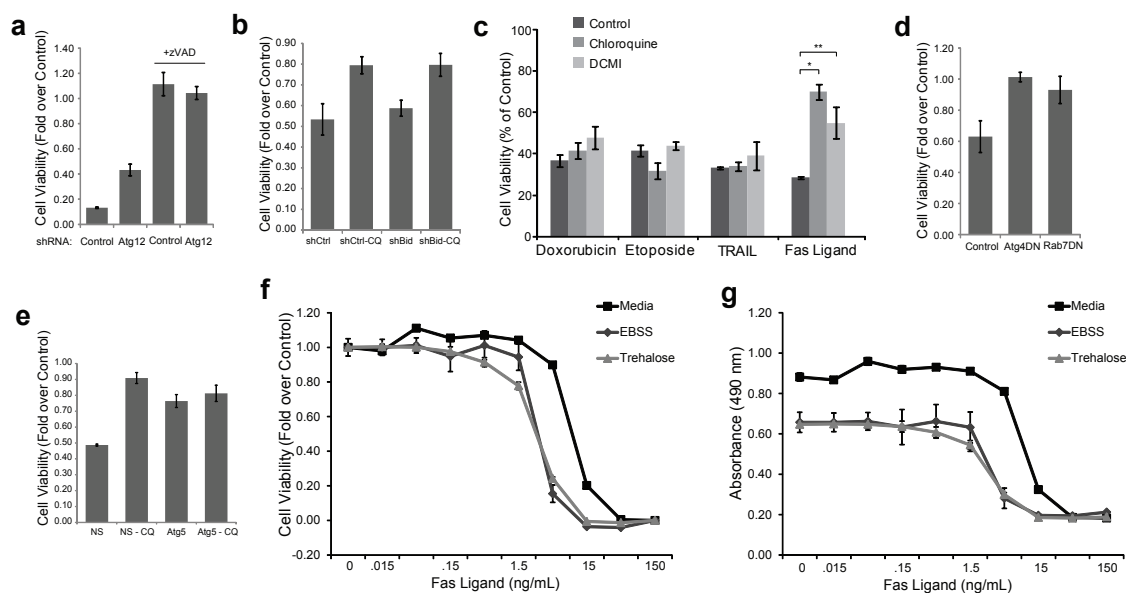

**Supplementary Figure 4** Effect of autophagy inhibition or autophagy induction on Fas ligand-induced death. **a**, BJAB cells expressing control or Atg12 shRNA were treated with Fas ligand (15 ng/mL) for 24 hours in the presence or absence of zVAD-fmk (100  $\mu$ M). Cell viability was then quantitated by MTS absorbance (fold over untreated control, mean  $\pm$  s.e.m.,  $n=3$  wells). **b**, BJAB cells expressing control or Bid shRNA were treated with autophagy inhibitor chloroquine (25  $\mu$ M) for 12 hours followed by Fas ligand (4 ng/mL) for 24 hours. Cell viability was then quantitated by MTS (fold over untreated control, mean  $\pm$  s.e.m.,  $n=3$  wells). **c**, BJAB cells were treated with autophagy inhibitors chloroquine (20  $\mu$ M) or desmethylclomipramine (DCMI, 10  $\mu$ M) for 12 hours followed by treatment with the indicated cytotoxic agents for 24 hours. Cells were then assayed for viability by MTS (% of control (no cytotoxic drug), mean  $\pm$  s.e.m.,  $n=3$  wells,  $*p=0.0024$ ,  $**p=0.017$ ). **d**, BJAB cells expressing vector control or

the indicated autophagy dominant-negative constructs were treated with Fas ligand (4 ng/mL) for 24 hours; cell viability was then quantitated by MTS absorbance (fold over untreated control, mean  $\pm$  s.e.m.,  $n=3$  wells). Data are representative of 2 independent experiments. **e**, BJAB cells expressing control or Atg5 shRNA were treated with chloroquine (20  $\mu$ M) for 12 hours followed by Fas ligand (4 ng/mL) for 24 hours. Cell viability was then quantitated by MTS (fold over no ligand control, mean  $\pm$  s.e.m.,  $n=3$  wells). Data are representative of 3 independent experiments. **f**, **g**, BJAB cells were treated with the indicated autophagy inducers overnight (EBSS, 100%; trehalose, 75 mM) followed by treatment with Fas ligand at the indicated concentrations for 24 hours. Cell viability was then quantitated by MTS absorbance. **f**, MTS data normalized (fold over untreated (no Fas ligand) control, mean  $\pm$  s.e.m.,  $n=3$  wells). **g**, Raw MTS values (absorbance at 490 nm, mean  $\pm$  s.e.m.,  $n=3$  wells).

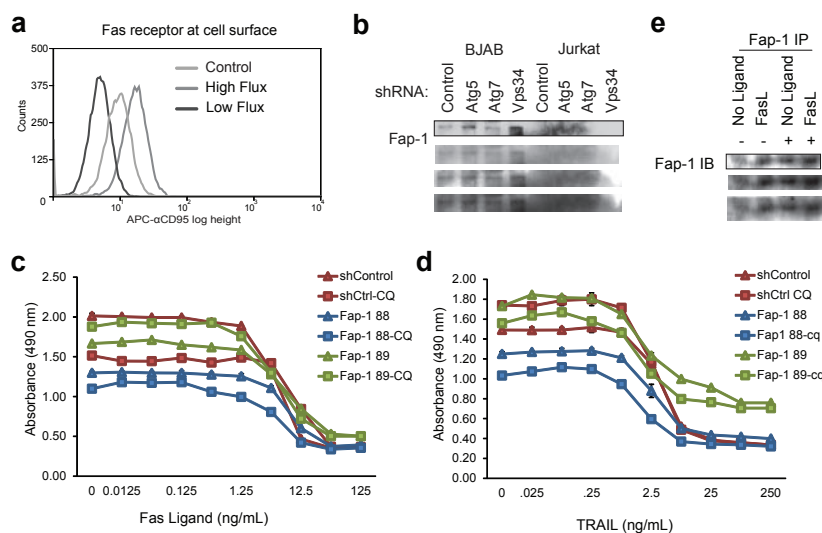

**Supplementary Figure 5** Autophagy controls cell surface expression of Fas receptor via Fap-1. **a**, BJAB mCherry-GFP-LC3 cells were sorted for autophagic flux by flow cytometry, and then stained with APC-conjugated anti-Fas antibody at 4 °C for 30 minutes. Cells were then washed and analyzed by flow cytometry. Data are representative of 3 replicates from 3 independent experiments. **b**, Additional exposures of immunoblots from experiment in Fig. 4f. **c-d**, BJAB

cells expressing control or Fap-1 shRNAs were treated with 20  $\mu$ M chloroquine for 12 hours followed by treatment with Fas ligand (**c**) or TRAIL (**d**) at the indicated concentrations for 24 hours. Cell viability was quantitated by MTS (absorbance at 490 nm, mean  $\pm$  s.e.m., n=3 wells). These are the full dose response curves (without normalization) from the data in Figure 5c. **e**, Additional exposures from immunoprecipitation experiment depicted in Fig. 6c.

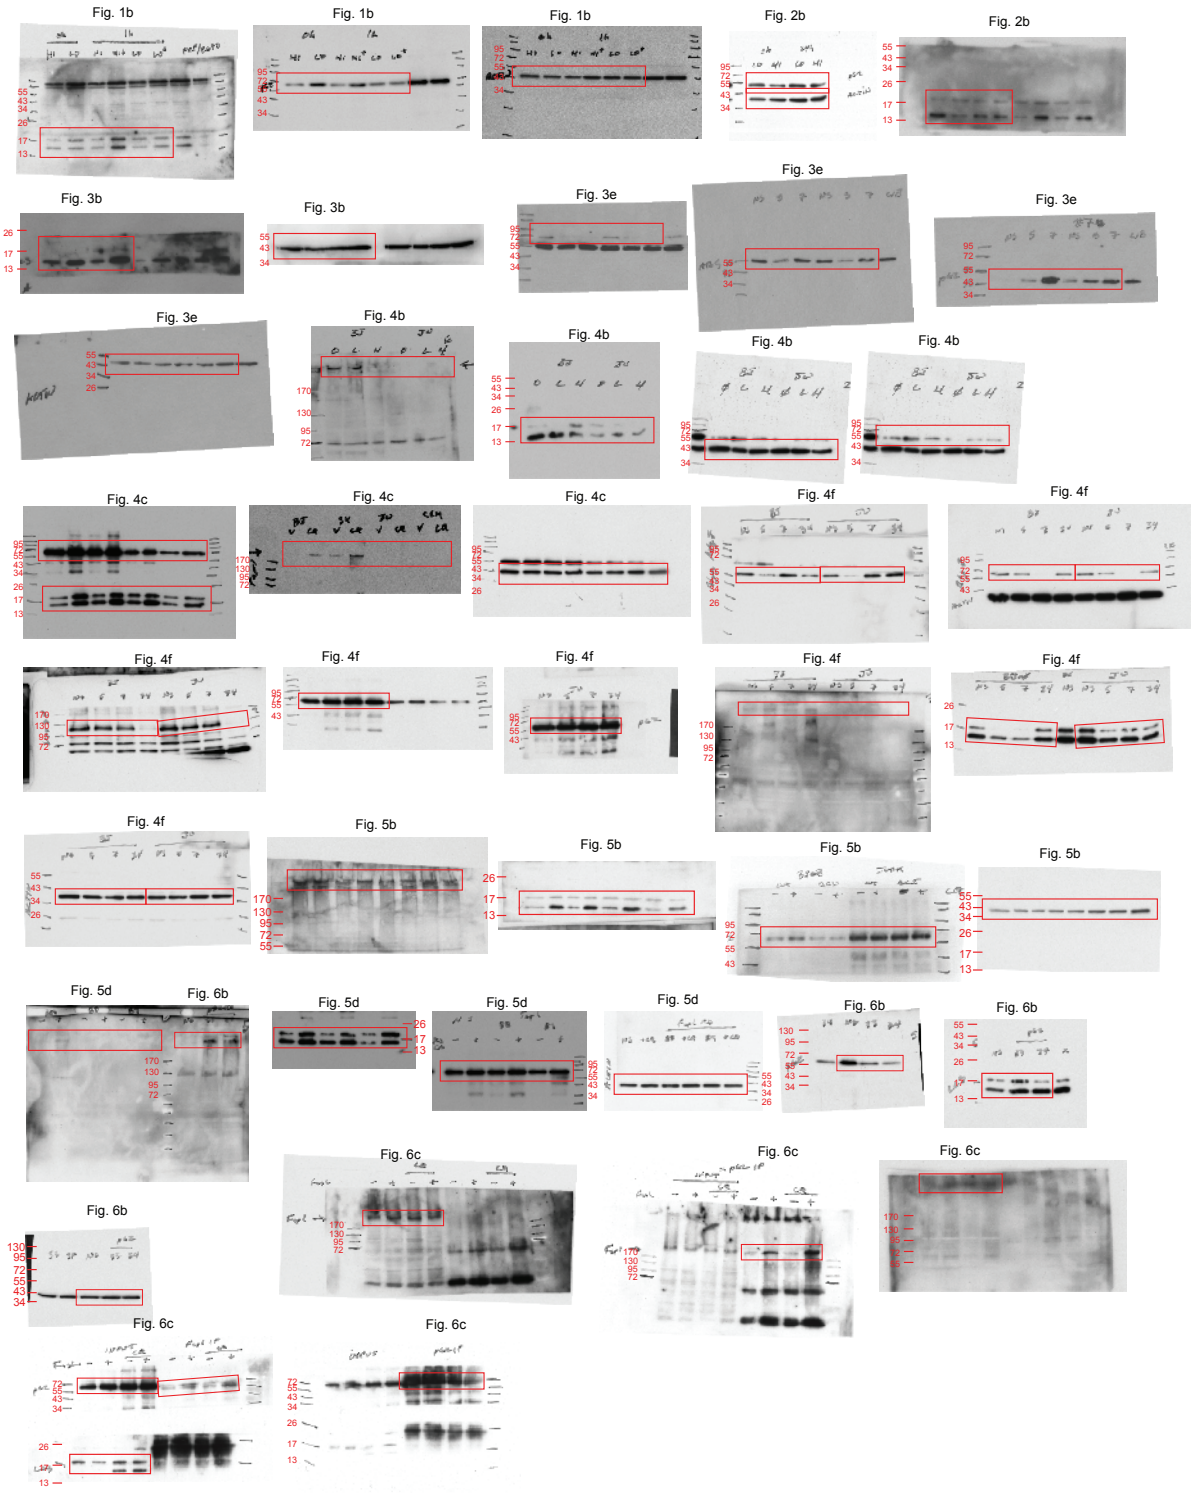

**Supplementary Figure 6** Full immunoblot images. Red boxes indicate the cropped portion of each western blot presented in the corresponding main figures.
